# Supplementary material for: Variable readthrough responsiveness of nonsense mutations in hemophilia A
Source: PubMed Central journal article supplement — Haematologica. 2019 Jun 13;105(2):508–18. doi: 10.3324/haematol.2018.212118 (PMC7012483; doi:10.3324/haematol.2018.212118), 2020-02
Supplement: 2018_212118-Disclosures_and_Contributions.pdf [file 2018_212118-Disclosures_and_Contributions.pdf]

Haematologica  
HAEMATOL/2018/212118  
Version 3

Variable readthrough responsiveness of nonsense mutations in  
hemophilia A

Lluís Martorell, Vicente Cortina, Rafael Parra, Jordi Barquinero, and  
Francisco Vidal

Disclosures: This project was supported by two grants from the Instituto de Salud Carlos III (PI11/03024 and PI11/03029) / e-Rare-2 (HEMO-iPS) that were cofinanced by the European Regional Development Fund (FEDER), and the Europe Aspire 2013 Award in Hemophilia Research. The authors declare no conflicts of interest.

Contributions: J.B. and F.V. initiated and coordinated the study. L.M., J.B. and F.V. participated in the study design, L.M. in data collection and the laboratory analyses, and V.C. in the design and optimization of the FVIII:C assay, L.M., R.P., J.B. and F.V. analyzed and interpreted the results, and L.M., J.B. and F.V. wrote the paper. All of the authors checked and approved of the final version of the manuscript.
